# Supplementary material
Source: PubMed Central journal article supplement (PMC2780762)
Supplement: 0905470106_0905470106SI.pdf [file 0905470106_0905470106SI.pdf]

# Supporting Information

Guo et al. 10.1073/pnas.0905470106

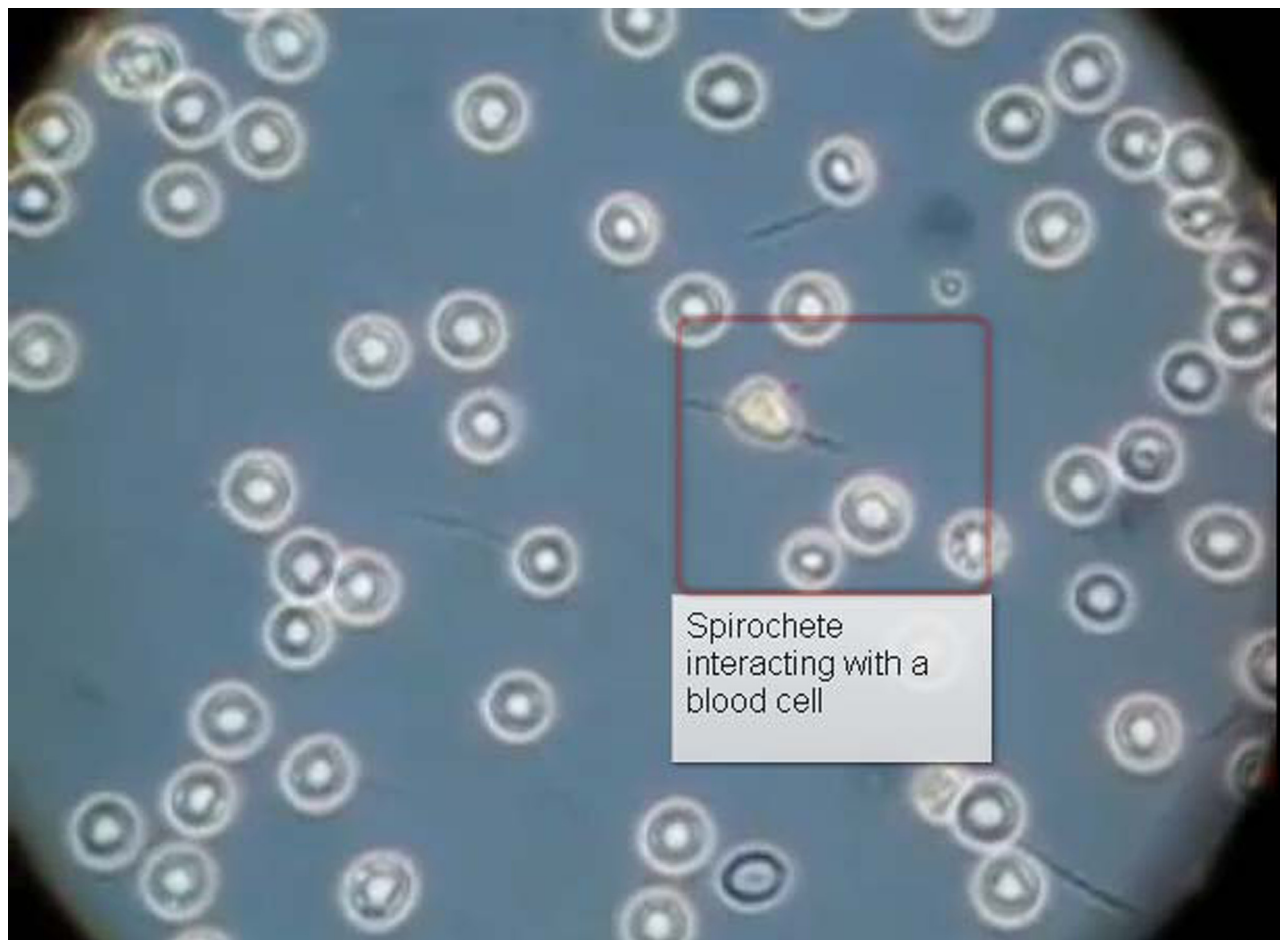

**Movie S1.** One-on-one interaction between a red blood cell and a *Borrelia* spirochete. Blood from a C3H/HeJ mouse infected with *B. duttonii* 1120 was drawn into sodium citrate buffer. Video was taken under light microscopy. Note the tight yet reversible interaction where the blood cell rolls across the length of the spirochete.

[Movie S1 \(AVI\)](#)
